# Supplementary material for: Thiazole orange-carboplatin triplex-forming oligonucleotide (TFO) combination probes enhance targeted DNA crosslinking
Source: Royal Society of Chemistry journal article supplement (doi:10.1039/d3md00548h), 2023-10-31
Supplement: d3md00548h1.pdf [file d3md00548h1.pdf]

Supporting Information accompanying the manuscript

## **Thiazole Orange-Carboplatin Triplex-Forming Oligonucleotide (TFO) Combination Probes Enhance Targeted DNA Crosslinking**

Joseph Hennessy,<sup>a</sup> Piotr Klimkowski,<sup>b</sup> Daniel Singleton,<sup>c</sup> Alex Gibney,<sup>a</sup> Malou Coche,<sup>a</sup> Nicholas P. Farrell,<sup>d</sup> Afaf H. El-Sagheer,<sup>b,e,f</sup> Tom Brown<sup>b,c</sup> and Andrew Kellett.<sup>a\*</sup>

<sup>a</sup>. SSPC, the Science Foundation Ireland Research Centre for Pharmaceuticals, School of Chemical Sciences, Dublin City University, Glasnevin, Dublin 9, Ireland, Email: Andrew.kellett@dcu.ie

<sup>b</sup>. Chemistry Research Laboratory, University of Oxford, 12 Mansfield Road, Oxford OX1 3TA, United Kingdom.

<sup>c</sup>. ATDBio, Ltd., School of Chemistry, University of Southampton, Southampton, SO17 1BJ, United Kingdom.

<sup>d</sup>. Department of Chemistry, Virginia Commonwealth University, Richmond, VA 23284-2006, United States.

<sup>e</sup>. School of Chemistry, University of Southampton, Southampton, SO17 1BJ, United Kingdom.

<sup>f</sup>. Department of Science and Mathematics, Suez University, Faculty of Petroleum and Mining, Engineering, Suez 43721, Egypt.

### **List of Contents:**

**S1: Mass Spectroscopy Analysis of Oligonucleotides**

**S2: Fluorescent Thermal Melting Analysis of Pt(II)-TFO Hybrids**

**S3: Pt(II)-TFO Hybrid Click Chemistry Yields**

**S4: Pt(II)-TFO Hybrid PAGE**

**S5: Pt(II)-TFO Hybrid pH Comparison**

**S6: Fluorescent Triplex Formation**

**S7: NaCN Crosslink Reversal PAGE**

## S1: Mass Spectroscopy Analysis of Oligonucleotides

**Table S1.** Oligonucleotides, Pt(II)-TFO Hybrids and Duplex Targets. **AP-C3-dT** = 5-propargylamino(N-propargyl-N-propyl-2,2,2-trifluoroacetamide)-5'-O-(4,4'-dimethoxy-trityl)-2'-deoxythymidine diisopropylamino cyanoethyl phosphoramidite; **pdU-TO** = 5-(1-propargylamino)-deoxyuridine with TO<sub>B6</sub> coupled; **Pt-N<sub>3</sub>-Carbo** = *cis*-[Pt(2-azidopropane-1,3-diamine)(CBDCA)]; **57 tgt** = 57 bp GFP duplex target; **DF tgt** = Duplex-Fluorophore purine target sequence; **DF comp** = Duplex-Fluorophore pyrimidine complimentary sequence.

| Oligo                      | Sequence                                                                                   | Modification<br>(X)(C)(U)                                                     | Calc.<br>Mass | Obs. Mass |
|----------------------------|--------------------------------------------------------------------------------------------|-------------------------------------------------------------------------------|---------------|-----------|
| <b>TFO1</b>                | 5'- <b>C</b> TC TTT CCT TCC CTT<br>CTT TCG CTT TCC TC-3'                                   | 5'-dC                                                                         | 8694.1        | 8694.3    |
| <b>TFO1-Carbo</b>          | 5'- <b>C</b> TC TTT CCT TCC CTT<br>CTT TCG CTT TCC TC-3'                                   | 5'-dC-N <sub>3</sub> -Pt (II)-Carbo                                           | 9146          | 9146.1    |
| <b>TOTFO1-Carbo</b>        | 5'- <b>C</b> TC TTT <b>CCU</b> TCC CTT<br>CTT TCG CTT TCC TC-3'                            | 5'-dC-N <sub>3</sub> -Pt (II)-Carbo,<br>pdU-TO (x1)                           | 9572.3        | 9571.7    |
| <b>TOTFO2-Carbo</b>        | 5'- <b>C</b> TC TTT <b>CCU</b> TCC <b>CTU</b><br>CTT TCG CTT TCC TC-3'                     | 5'-dC-N <sub>3</sub> -Pt (II)-Carbo,<br>pdU-TO (x2)                           | 9998.2        | 9997.4    |
| <b>TOTFO3-Carbo</b>        | 5'- <b>C</b> TC TTT <b>CCU</b> TCC <b>CTU</b><br>CTT TCG CTT <b>UCC</b> TC-3'              | 5'-dC-N <sub>3</sub> -Pt (II)-Carbo,<br>pdU-TO (x3)                           | 10424.3       | 10422.8   |
| <b>AATFO1-Carbo</b>        | 5'- <b>X</b> CT TTC CTT CCC TTC<br>TTT CGC TTT CCT C-3'                                    | 5'-AP-C3-dT-TO,<br>5'-AP-C3-dT-N <sub>3</sub> -Pt (II)-<br>Carbo              | 9274.0        | 9273.9    |
| <b>AATFO2-Carbo</b>        | 5'- <b>X</b> CT TTC <b>CU</b> T CCC TTC<br>TTT CGC TTT CCT C-3'                            | 5'-AP-C3-dT-TO,<br>5'-AP-C3-dT-N <sub>3</sub> -Pt (II)-<br>Carbo, pdU-TO (x1) | 9700.2        | 9699.1    |
| <b>AATFO3-Carbo</b>        | 5'- <b>X</b> CT TTC <b>CU</b> T CCC <b>TUC</b><br>TTT CGC TTT CCT C-3'                     | 5'-AP-C3-dT-TO,<br>5'-AP-C3-dT-N <sub>3</sub> -Pt (II)-<br>Carbo, pdU-TO (x2) | 10126.0       | 10124.6   |
| <b>57 bp tgt.</b>          | 5'-AAG CCG GCG AAC GTG<br>GCG AGA AAG GAA GGG AAG<br>AAA GCG AAA GGA GCG GGC<br>GCT AGG-3' | n/a                                                                           | 17972.5       | 17972.8   |
| <b>57 bp comp.</b>         | 3'-TTC GGC CGC TTG CAC<br>CGC TCT TTC CTT CCC TTC<br>TTT CGC TTT CCT CGC CCG<br>CGA TCC-5' | n/a                                                                           | 17129.9       | 17129.7   |
| <b>DF tgt.</b>             | 5'-Cy5- ACC GTG GCG AGA<br>AAG GAA GGG AAG AAA GCG<br>AAA GGA GCG G -3'                    | 5'-Cyanine 5 label                                                            | 13157.9       | 13156.9   |
| <b>DF comp.</b>            | 3'- TGG CAC CGC TCT TTC<br>CTT CCC TTC TTT CGC TTT<br>CCT CGC C -6FAM-5'                   | 5'-6-FAM label                                                                | 12507.2       | 12505.8   |
| <b>40 bp off<br/>tgt.</b>  | 5'- TGA CTC CCC GTC GTG<br>TAG ATA ACT ACG ATA CGG<br>GAG GGC T -3'                        | n/a                                                                           | 12336.9       | n/a       |
| <b>40 bp off<br/>comp.</b> | 3'- ACT GAG GGG CAG CAC<br>ATC TAT TGA TGC TAT GCC<br>CTC CCG A -5'                        | n/a                                                                           | 12256.9       | n/a       |

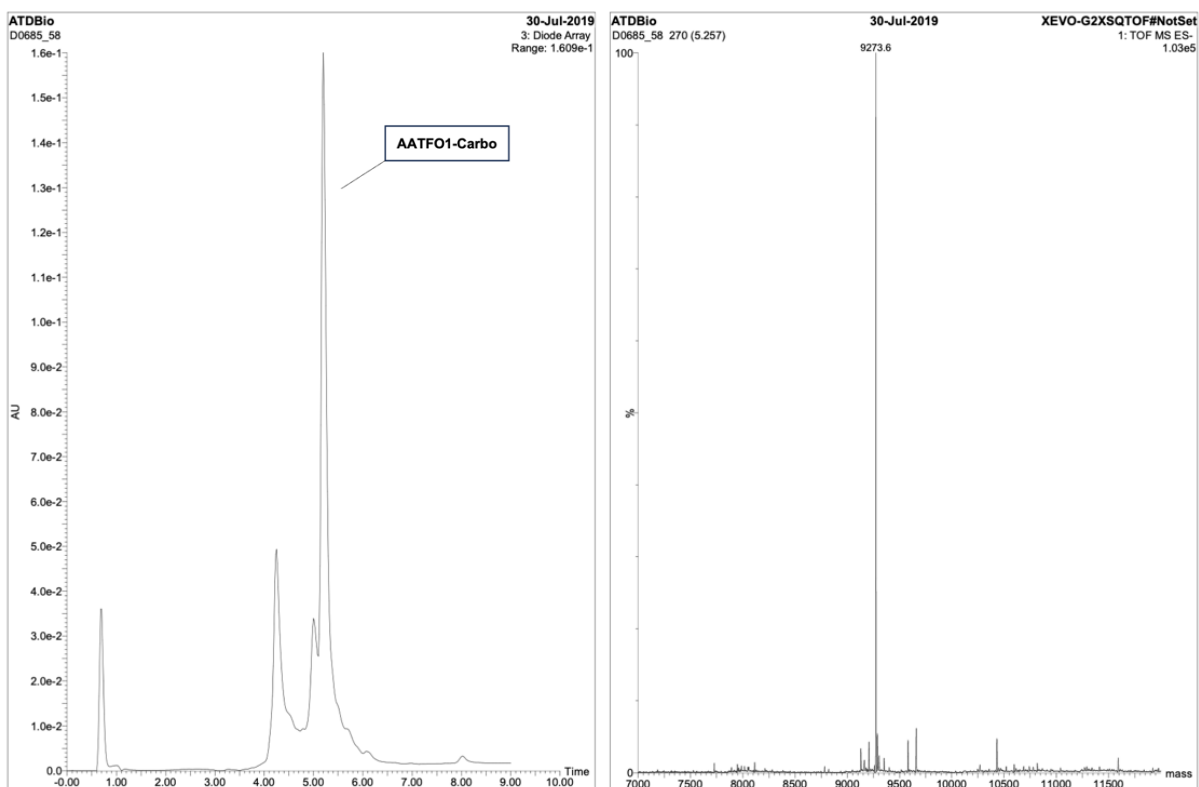

**Figure S1.** HPLC (left, x-axis = time (min) and y-axis = UV absorbance at 260 nm) and ESI-MS (right) spectra for AATFO1-Carbo.

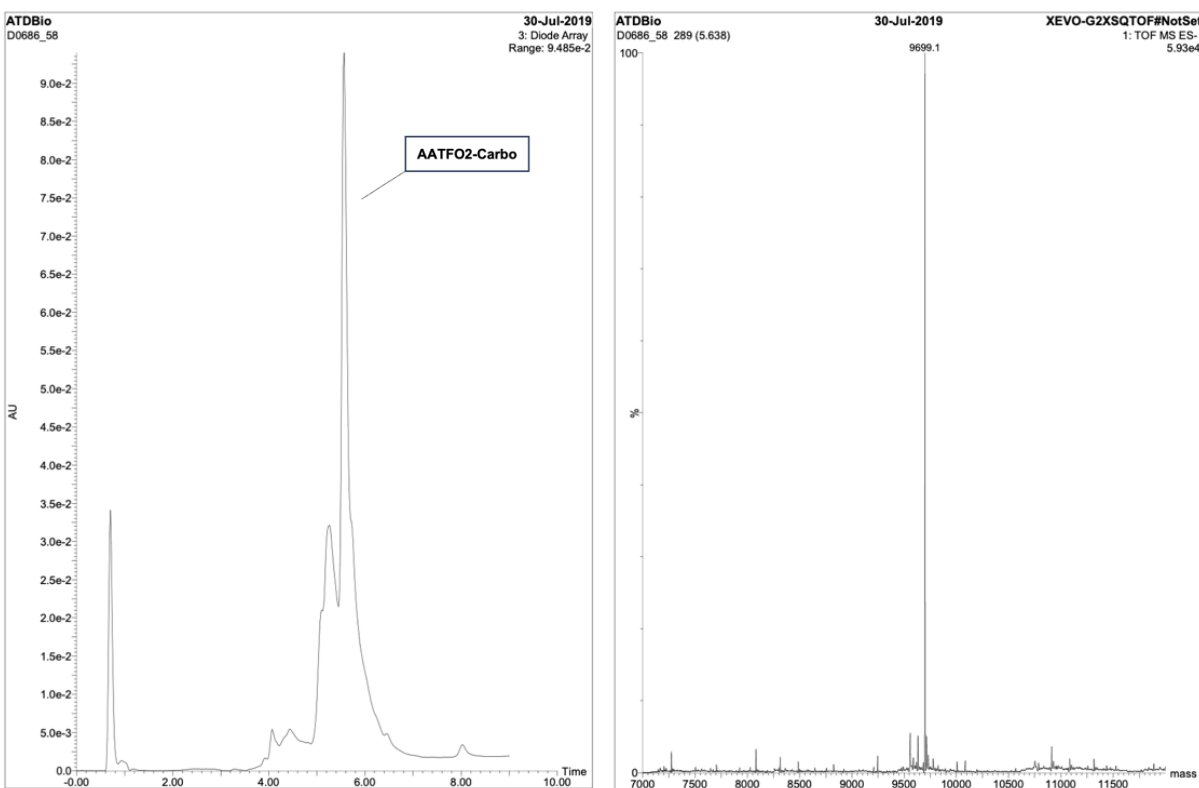

**Figure S2.** HPLC (left, x-axis = time (min) and y-axis = UV absorbance at 260 nm) and ESI-MS (right) spectra for AATFO2-Carbo.

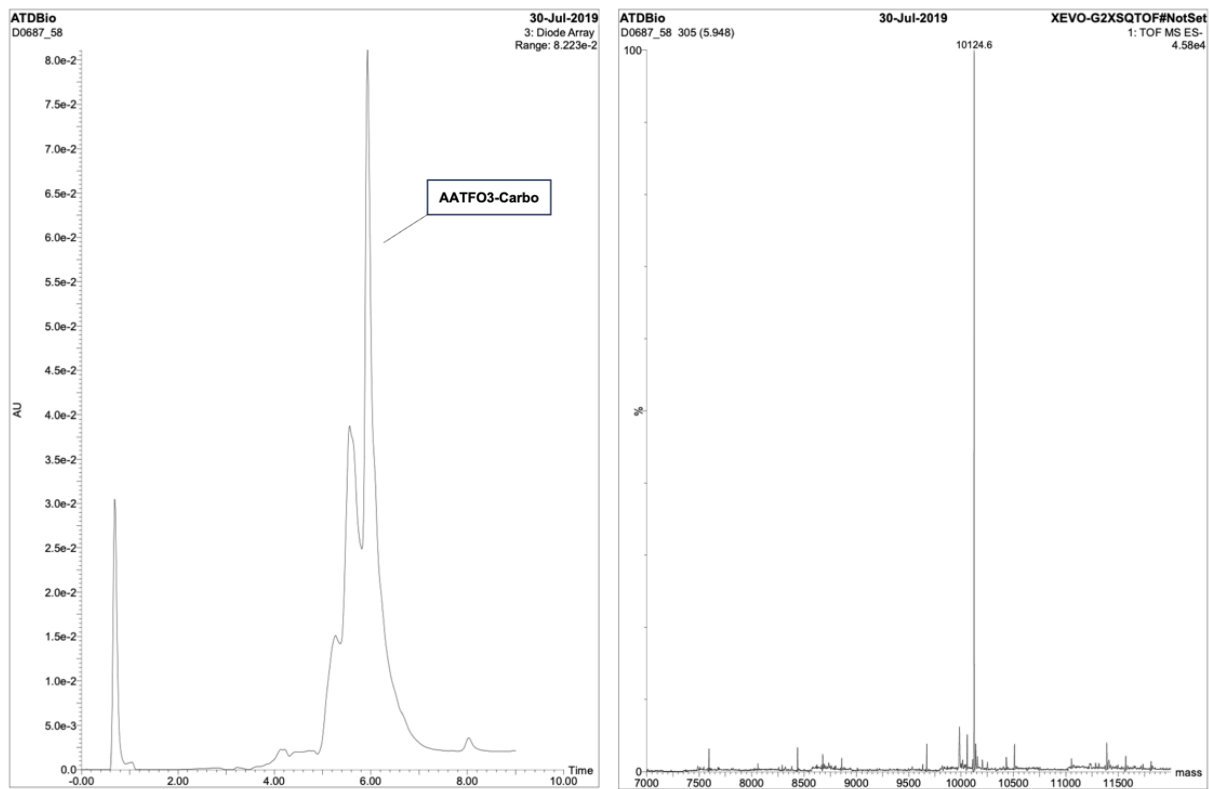

**Figure S3.** HPLC (left, x-axis = time (min) and y-axis = UV absorbance at 260 nm) and ESI-MS (right) spectra for AATF03-Carbo.

## S2. Fluorescent Thermal Melting Analysis of Pt(II)-TFO Hybrids

**Table S2.**  $T_M$  values were recorded in 10 mM phosphate ( $PO_4^{3-}$ ), 150 mM NaCl, 2 mM  $MgCl_2$ , pH 6-7 buffer. Samples were incubated at 37 °C for 48 h prior to melting analysis.  $T_M$  temperatures were calculated by the first negative derivative of the normalised fluorescence melting curve and graphed using GraphPad Prism 9.0. Final  $T_M$  values are an average of 3 melting samples.  $\Delta T_M$  values for Pt(II)-TFOs are relative to the unclicked alkyne TFO precursor. **5'-dC** = 5'-(5)octadynyl-deoxycytidine; **pdU-TO** = 5-(1-propargylamino)-deoxyuridine with  $TO_{B6}$  coupled; **Pt-N<sub>3</sub>-Carbo** = *cis*-[Pt(2-azidopropane-1,3-diamine)(CBDCA)]; **n.t.o.** = no triplex observed.

| Triplex             | Modification                                                                 | pH 6.0     |              | pH 6.5      |              | pH 6.8     |              | pH 7.0     |              |
|---------------------|------------------------------------------------------------------------------|------------|--------------|-------------|--------------|------------|--------------|------------|--------------|
|                     |                                                                              | $T_M$ (°C) | $\Delta T_M$ | $T_M$ (°C)  | $\Delta T_M$ | $T_M$ (°C) | $\Delta T_M$ | $T_M$ (°C) | $\Delta T_M$ |
| <b>TFO1</b>         | 5'-dC                                                                        | 45.7 ± 0.5 | -            | n.t.o       | -            | n.t.o      | -            | n.t.o      | -            |
| <b>TFO1-Carbo</b>   | 5'-dC-N <sub>3</sub> -Pt (II)-Carbo                                          | 44.3 ± 0.9 | -1.4         | n.t.o       | -            | n.t.o      | -            | n.t.o      | -            |
| <b>TOTFO1-Carbo</b> | 5'-dC-N <sub>3</sub> -Pt (II)-Carbo<br>pdU-TO (x1)                           | 50.9 ± 0.7 | + 5.2        | 49.6 ± 0.6  | -            | n.t.o      | -            | n.t.o      | -            |
| <b>TOTFO2-Carbo</b> | 5'-dC-N <sub>3</sub> -Pt (II)-Carbo<br>pdU-TO (x2)                           | 49.9 ± 0.4 | + 4.2        | 45.9 ± 0.8  | -            | n.t.o      | -            | n.t.o      | -            |
| <b>TOTFO3-Carbo</b> | 5'-dC-N <sub>3</sub> -Pt (II)-Carbo<br>pdU-TO (x3)                           | 48.5 ± 1.3 | + 2.8        | 45.8 ± 0.6  | -            | n.t.o      | -            | n.t.o      | -            |
| <b>AATFO1-Carbo</b> | 5'-AP-C3-dT-TO,<br>5'-AP-C3-dT-N <sub>3</sub> -Pt (II)-Carbo                 | 62.8 ± 0.3 | + 17.1       | 49.3 ± 0.8  | -            | 39.1 ± 0.2 | -            | 35.4 ± 0.2 | -            |
| <b>AATFO2-Carbo</b> | 5'-AP-C3-dT-TO,<br>5'-AP-C3-dT-N <sub>3</sub> -Pt (II)-Carbo,<br>pdU-TO (x1) | 54.8 ± 1.1 | + 9.1        | 48.6 ± 0.2  | -            | 50.1 ± 0.1 | -            | 48.7 ± 0.4 | -            |
| <b>AATFO3-Carbo</b> | 5'-AP-C3-dT-TO,<br>5'-AP-C3-dT-N <sub>3</sub> -Pt (II)-Carbo,<br>pdU-TO (x2) | 60.3 ± 0.2 | + 14.6       | 54.50 ± 1.3 | -            | 47.9 ± 0.3 | -            | 54.1 ± 0.9 | -            |
| Duplex              | Sequence                                                                     | pH 6.0     |              | pH 6.5      |              | pH 6.8     |              | pH 7.0     |              |
| 57 target           | 57 bp                                                                        | 80.3 ± 0.1 |              | 80.2 ± 0.1  |              | 80.4 ± 0.1 |              | 80.4 ± 0.1 |              |

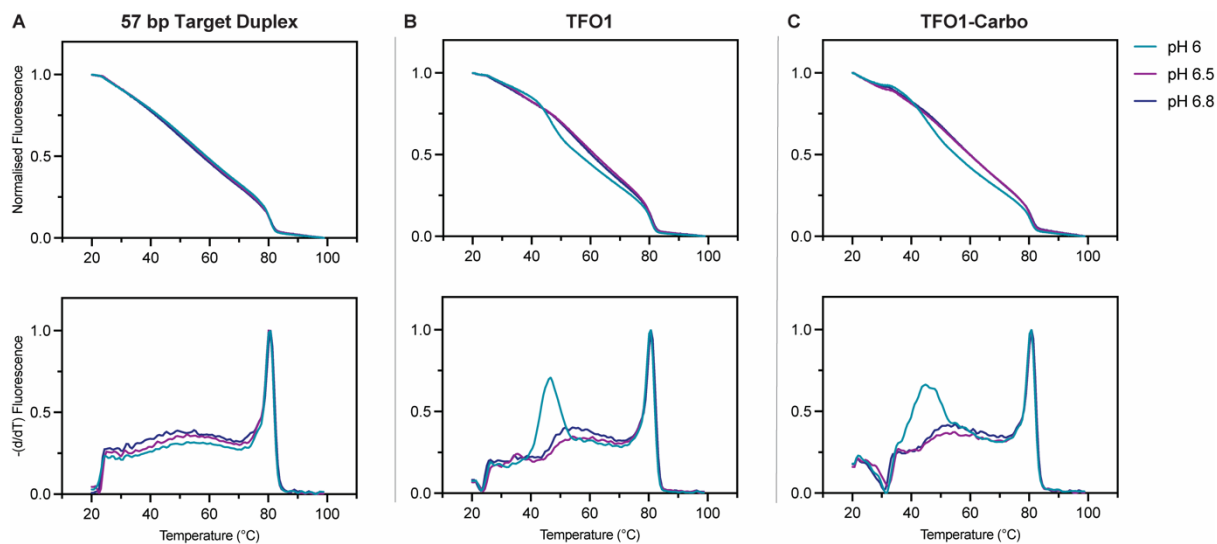

**Figure S4.** (Top) Normalised fluorescence melting curve plot and (Bottom) first negative derivative of fluorescence melting for (A) Duplex, (B) TFO1 and (C) TFO1-Carbo.

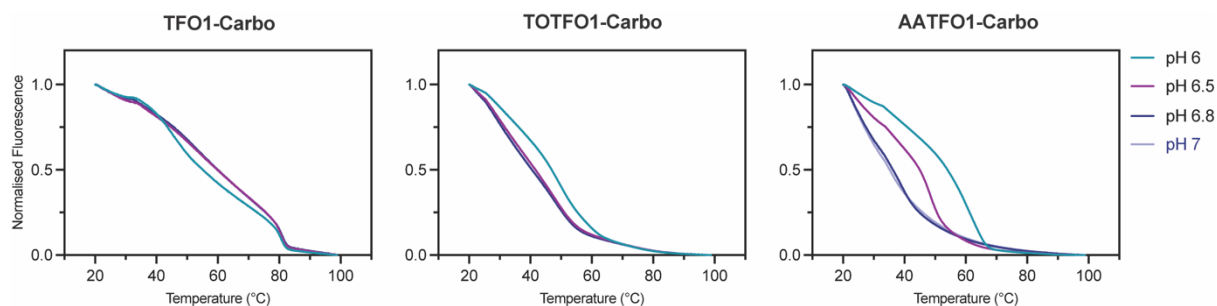

**Figure S5.** Normalised fluorescence melting curve plots for TFO1-Carbo, TOTFO1-Carbo and AATFO1-Carbo. Correspond to negative derivative melting plots for Figure 2.

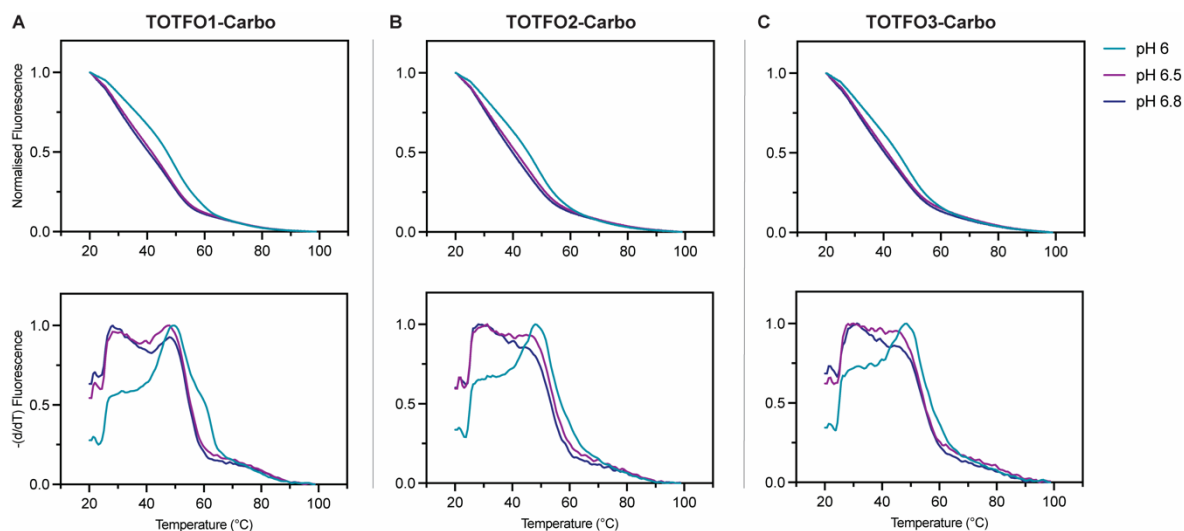

**Figure S6.** (Top) Normalised fluorescence melting curve plot and (Bottom) first negative derivative for fluorescence melting for (A) TOTFO1-Carbo, (B) TOTFO2-Carbo and (C) TOTFO3-Carbo. No triplex melting was observed for any hybrids at pH 7.

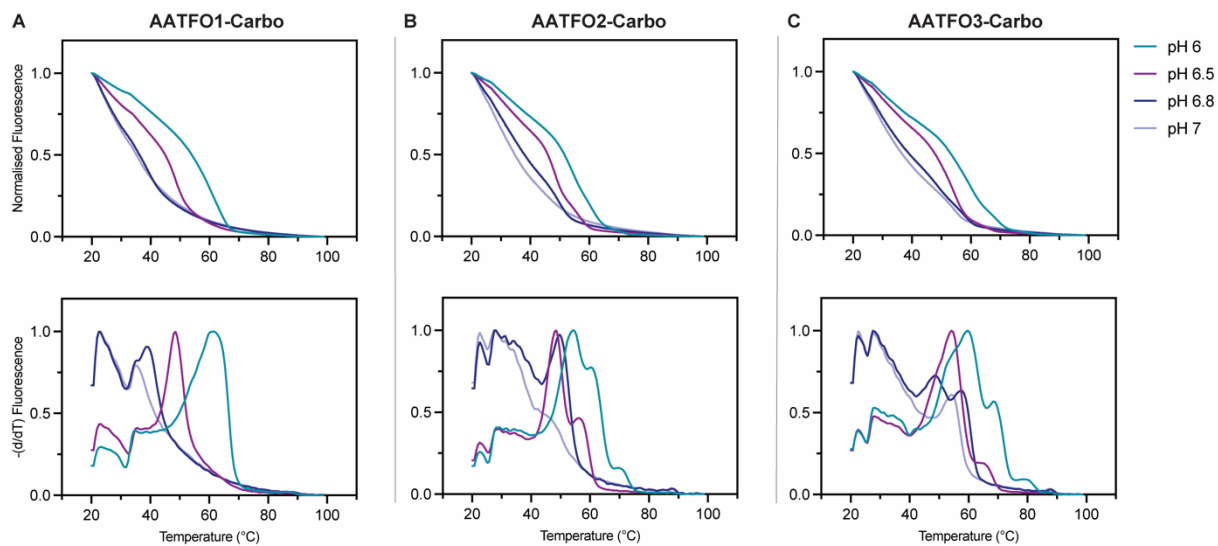

**Figure S7. (Top)** Normalised fluorescence melting curve plot and **(Bottom)** first negative derivative for fluorescence melting for **(A)** AATFO1-Carbo, **(B)** AATFO2-Carbo and **(C)** AATFO3-Carbo.

### S3. Pt(II)-TFO Hybrid Click Chemistry Yields

**Table S3.** 5'-dC = 5'-(5)octadiynyl-deoxycytidine; **pdU-TO** = 5-(1-propargylamino)-deoxyuridine with TO<sub>86</sub> coupled; **Pt-N<sub>3</sub>-Carbo** = *cis*-[Pt(2-azidopropane-1,3-diamine)(CBDCA)]. Platinum(II)-TFO hybrid yields were calculated with the Beer-Lambert Law using obtained absorbance values after quantification on a NanoDrop ND-1000 UV-Vis Spectrophotometer.

| Oligo               | Modification                                                                      | Yield (%) |
|---------------------|-----------------------------------------------------------------------------------|-----------|
| <b>TFO1-Carbo</b>   | 5'-dC-N <sub>3</sub> -Pt (II) -<br>Carbo                                          | 28.3      |
| <b>TOTFO1-Carbo</b> | 5'-dC-N <sub>3</sub> -Pt (II) -<br>Carbo<br>pdU-TO (x1)                           | 43.4      |
| <b>TOTFO2-Carbo</b> | 5'-dC-N <sub>3</sub> -Pt (II) -<br>Carbo<br>pdU-TO (x2)                           | 32.7      |
| <b>TOTFO3-Carbo</b> | 5'-dC-N <sub>3</sub> -Pt (II) -<br>Carbo<br>pdU-TO (x2)                           | 29.0      |
| <b>AATFO1-Carbo</b> | 5'-AP-C3-dT-TO,<br>5'-AP-C3-dT-N <sub>3</sub> -<br>Pt (II) -Carbo                 | 65.5      |
| <b>AATFO2-Carbo</b> | 5'-AP-C3-dT-TO,<br>5'-AP-C3-dT-N <sub>3</sub> -<br>Pt (II) -Carbo,<br>pdU-TO      | 55.7      |
| <b>AATFO3-Carbo</b> | 5'-AP-C3-dT-TO,<br>5'-AP-C3-dT-N <sub>3</sub> -<br>Pt (II) -Carbo,<br>pdU-TO (x2) | 49.2      |



## S4. Pt(II)-TFO Hybrids PAGE

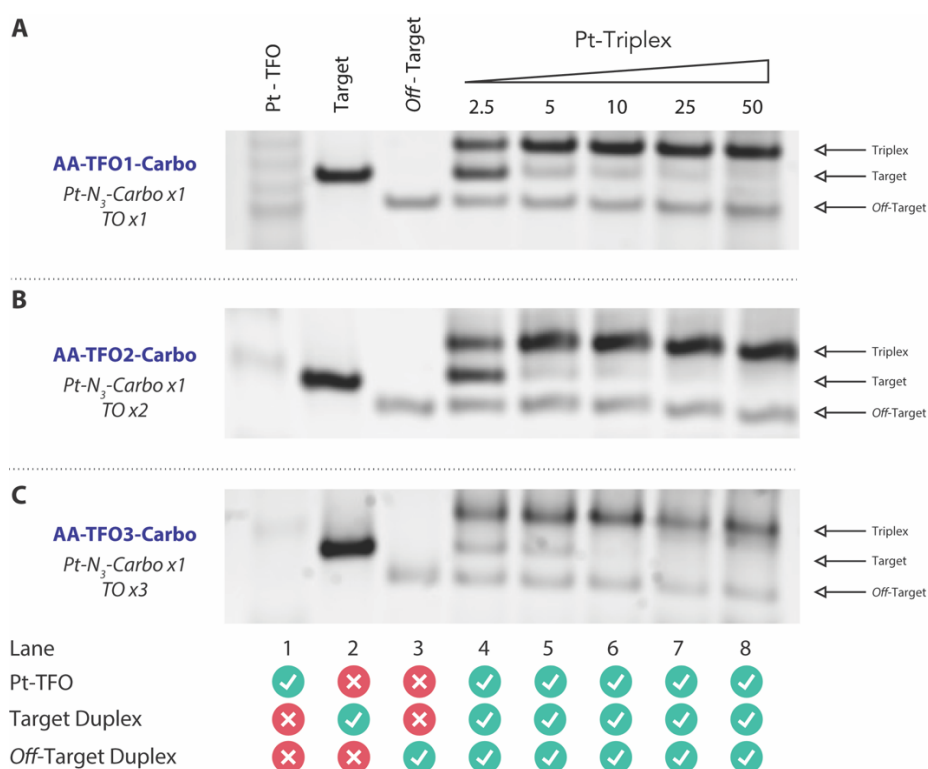

**Figure S8.** Triplex-crosslink formation for AATFO1-3 Carbo. Target (57 bp, 1 pmol) and off-target (40 bp, 1 pmol) treated with increasing concentrations of Pt(II)-TFO hybrid (2.5-50 eq., lanes 4-8) in triplex buffer. Pt(II)-TFO hybrid only crosslinks with target sequence. No ablation of off-target duplex is observed. PAGE analysis for Pt(II)-TFO hybrids was performed in Tris acetate triplex buffer (10 mM phosphate 150 mM NaCl 2 mM MgCl<sub>2</sub>, pH 6) at 70 V for 240 mins. Gels were post-stained with SYBR gold.

## S5. Pt(II)-TFO Hybrid pH Comparison

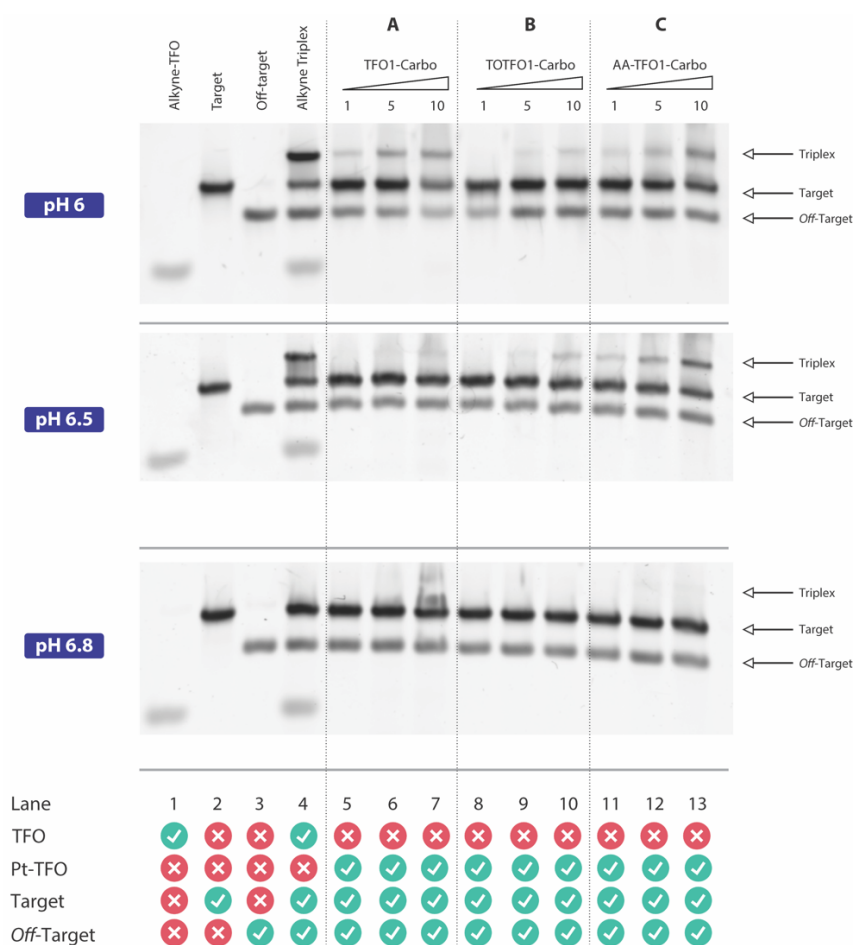

**Figure S9.** Triplex formation comparison between (A) TFO1-Carbo; (B) TOTFO1-Carbo; and (C) AATFO1-Carbo. Target (57, 1 pmol) and off-target (40 bp, 1 pmol) duplex incubated with increasing concentrations of Pt(II)-TFO hybrid (1, 5 and 10 eq.). Lane 4 with alkyne triplex formation acts as reference for Pt(II) crosslink mediated triplex formation. AATFO1-Carbo forms triplex up to 10 eq. at all pH measurements in comparison to TOTFO1-Carbo and TFO1-Carbo. PAGE analysis for Pt(II)-TFO hybrids was performed in Tris acetate triplex buffer (10 mM phosphate 150 mM NaCl 2 mM MgCl<sub>2</sub>, pH 6, 6.5 or 6.8) at 70 V for 240 mins. Gels were post-stained with SYBR gold.

## S6. Fluorescent Triplex Formation

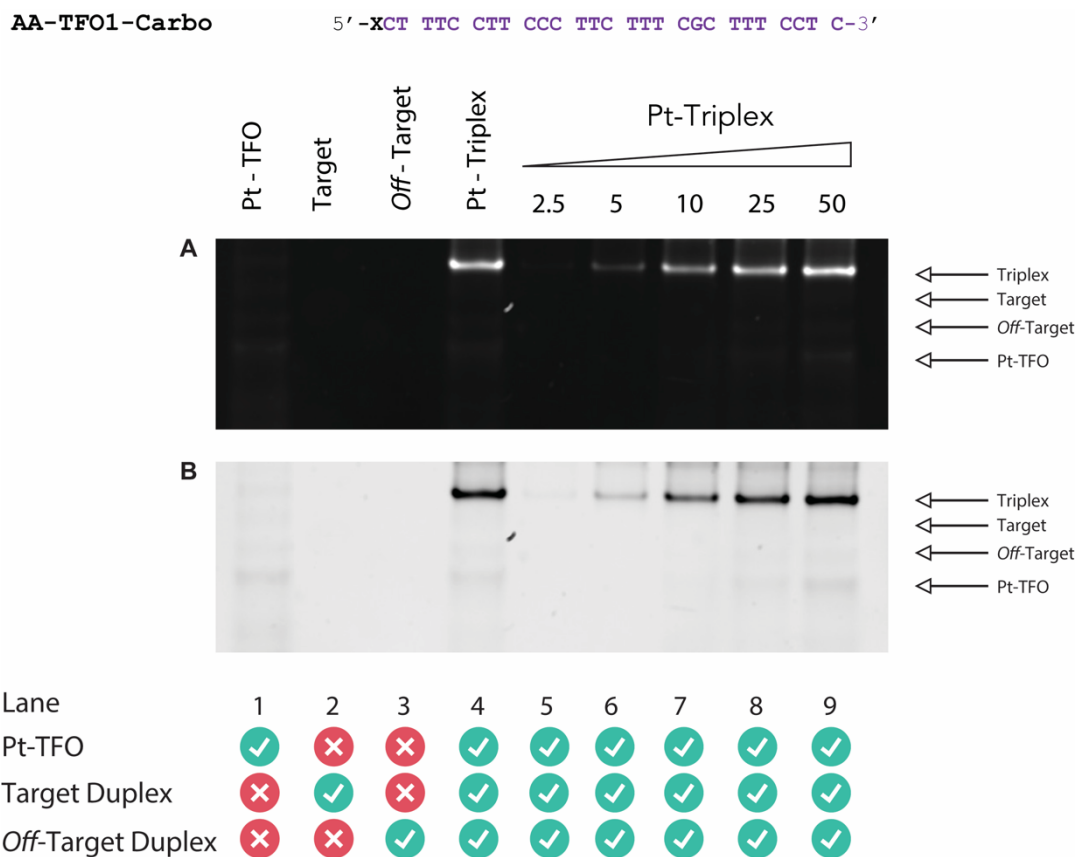

**Figure S10.** PAGE analysis of AATFO1-Carbo. Figure shown is PAGE displayed in manuscript **Figure 4C** without any additional post-staining. PAGE gel is visualised using standard filter for SYBR gold imaging. (**Top, A**) and (**Bottom, B**) represent different contrasts of the same gel to identify increased  $TO_{B6}$  intercalation with triplex formation as Pt-hybrid equivalents increases (2.5 – 50 eq., lanes 5-9). PAGE analysis for Pt(II)-TFO hybrids was performed in Tris acetate triplex buffer (10 mM phosphate 150 mM NaCl 2 mM  $MgCl_2$ , pH 6) at 70 V for 240 mins.

## S7. NaCN Crosslink Reversal PAGE

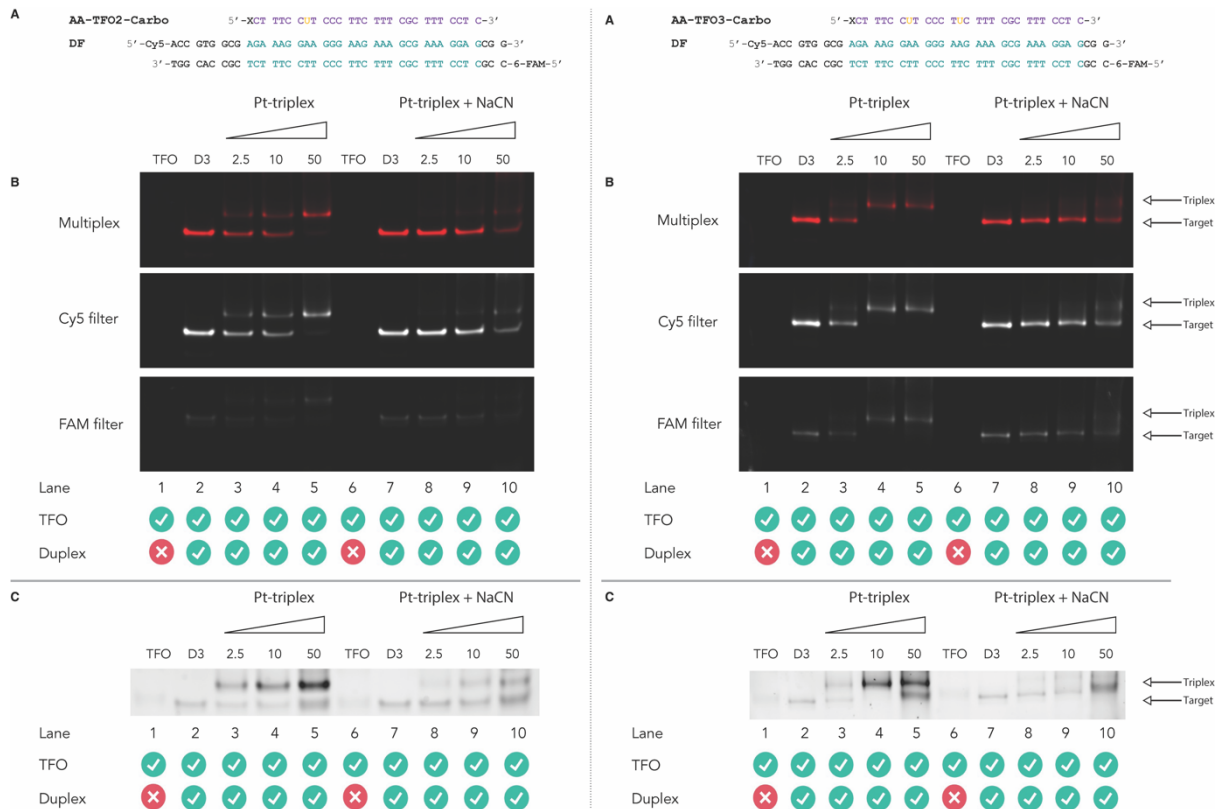

**Figure S11. (Left, A)** AATFO2-Carbo hybrid (28 nt) and fluorescently labelled duplex target **DF** (40 bp). **B.** **DF** treated with increasing concentrations of Pt(II)-TFO hybrid (2.5, 10 and 50 eq., lanes 3-5) and **DF** treated with increasing concentrations of Pt(II)-TFO hybrid (2.5,10 and 50 eq., lanes 8-10) prior to treatment and incubation with NaCN solution (5,000 eq.). Gel imaged using Cy5 and FAM filters with multiplex overlay. **C.** Gel post-stained with SYBR gold. **(Right, A)** AATFO3-Carbo hybrid (28 nt) and fluorescently labelled duplex target **DF** (40 bp). **B.** and **C.** Gel performed as AATFO2-Carbo. NaCN PAGE analysis for Pt(II)-TFO hybrids was performed in Tris acetate triplex buffer (10 mM phosphate 150 mM NaCl 2 mM MgCl<sub>2</sub>, pH 6) at 70 V for 240 mins.
